# Supplementary material for: Chemical Constituents and Antimicrobial Activity of a Ganoderma lucidum (Curtis.) P. Karst. Aqueous Ammonia Extract
Source: MDPI journal article supplement (doi:10.3390/plants12122271), 2023-06-11
Supplement: s1 [file s1]

# Chemical Constituents and Antimicrobial Activity of a *Ganoderma lucidum* (Curtis.) P. Karst. Aqueous Ammonia Extract

Eva Sánchez-Hernández, Ana Teixeira, Catarina Pereira, Adriana Cruz, Jesús Martín-Gil, Rui Oliveira and Pablo Martín-Ramos

## SUPPORTING INFORMATION

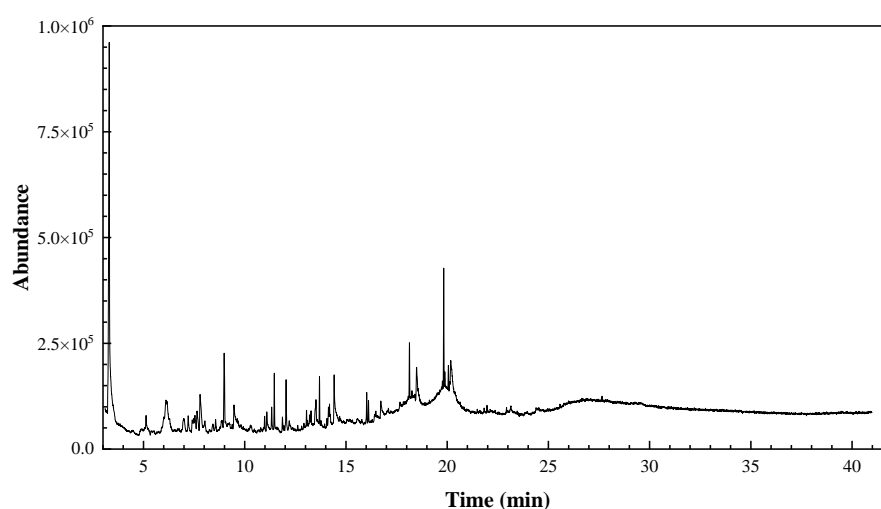

**Figure S1.** GC-MS chromatogram of *G. lucidum* carpophore aqueous ammonia extract.

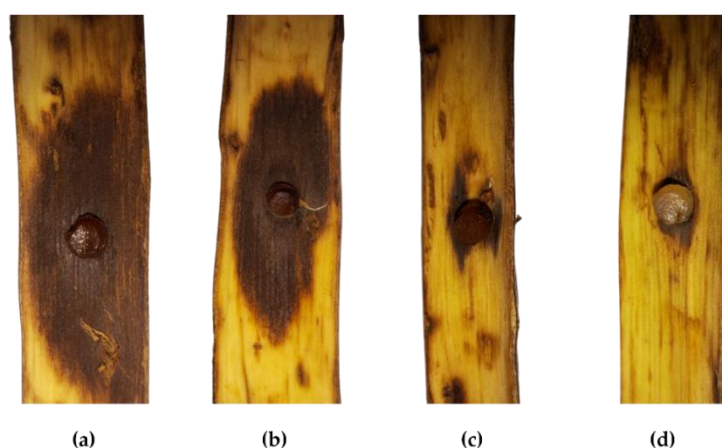

**Figure S2.** Canker lengths observed in holm oak excised stems artificially inoculated with *P. cinnamomi*: (a) control, no treatment; (b) treated with the COS-*G. lucidum* carpophore extract conjugate complex at MIC =  $78.12 \mu\text{g} \cdot \text{mL}^{-1}$ ; (c) MIC $\times 5$  =  $390.6 \mu\text{g} \cdot \text{mL}^{-1}$ ; (d) MIC $\times 10$  =  $781.2 \mu\text{g} \cdot \text{mL}^{-1}$ . Only one replicate per treatment is shown.

**Table S1.** Antimicrobial activity reported in the literature for *G. lucidum* extracts.

| Collection site | Solvent extraction            | Microorganism                      | Effectiveness                                    | Ref.      |
|-----------------|-------------------------------|------------------------------------|--------------------------------------------------|-----------|
| Spain           | Ammonia + water               | <i>Botryosphaeria dothidea</i>     | MIC = 500 $\mu\text{g}\cdot\text{mL}^{-1}$       | This work |
|                 |                               | <i>Diplodia corticola</i>          | MIC = 500 $\mu\text{g}\cdot\text{mL}^{-1}$       |           |
|                 |                               | <i>Dothiorella iberica</i>         | MIC = 750 $\mu\text{g}\cdot\text{mL}^{-1}$       |           |
|                 |                               | <i>Phytophthora cinnamomi</i>      | MIC = 187.5 $\mu\text{g}\cdot\text{mL}^{-1}$     |           |
| Serbia          | Methanol                      | <i>Staphylococcus aureus</i>       | MIC = 150 $\mu\text{g}\cdot\text{mL}^{-1}$       | [1]       |
|                 |                               | <i>Bacillus cereus</i>             | MIC = 17 $\mu\text{g}\cdot\text{mL}^{-1}$        |           |
|                 |                               | <i>Micrococcus flavus</i>          | MIC = 150 $\mu\text{g}\cdot\text{mL}^{-1}$       |           |
|                 |                               | <i>Listeria monocytogenes</i>      | MIC = 150 $\mu\text{g}\cdot\text{mL}^{-1}$       |           |
|                 |                               | <i>Pseudomonas aeruginosa</i>      | MIC = 17 $\mu\text{g}\cdot\text{mL}^{-1}$        |           |
|                 |                               | <i>Salmonella typhimurium</i>      | MIC = 35 $\mu\text{g}\cdot\text{mL}^{-1}$        |           |
|                 |                               | <i>Escherichia coli</i>            | MIC = 300 $\mu\text{g}\cdot\text{mL}^{-1}$       |           |
|                 |                               | <i>Enterobacter cloacae</i>        | MIC = 17 $\mu\text{g}\cdot\text{mL}^{-1}$        |           |
|                 |                               | <i>Aspergillus fumigatus</i>       | MIC = 70 $\mu\text{g}\cdot\text{mL}^{-1}$        |           |
|                 |                               | <i>Aspergillus versicolor</i>      | MIC = 35 $\mu\text{g}\cdot\text{mL}^{-1}$        |           |
|                 |                               | <i>Aspergillus ochraceus</i>       | MIC = 150 $\mu\text{g}\cdot\text{mL}^{-1}$       |           |
|                 |                               | <i>Aspergillus niger</i>           | MIC = 600 $\mu\text{g}\cdot\text{mL}^{-1}$       |           |
|                 |                               | <i>Trichoderma viride</i>          | MIC = 70 $\mu\text{g}\cdot\text{mL}^{-1}$        |           |
|                 |                               | <i>Penicillium funiculosum</i>     | MIC = 150 $\mu\text{g}\cdot\text{mL}^{-1}$       |           |
|                 |                               | <i>Penicillium ochrochloron</i>    | MIC = 300 $\mu\text{g}\cdot\text{mL}^{-1}$       |           |
|                 |                               | <i>Penicillium aurantiogriseum</i> | MIC = 600 $\mu\text{g}\cdot\text{mL}^{-1}$       |           |
| China           | Methanol                      | <i>S. aureus</i>                   | MIC = 70 $\mu\text{g}\cdot\text{mL}^{-1}$        | [1]       |
|                 |                               | <i>B. cereus</i>                   | MIC = 35 $\mu\text{g}\cdot\text{mL}^{-1}$        |           |
|                 |                               | <i>M. flavus</i>                   | MIC = 100 $\mu\text{g}\cdot\text{mL}^{-1}$       |           |
|                 |                               | <i>L. monocytogenes</i>            | MIC = 150 $\mu\text{g}\cdot\text{mL}^{-1}$       |           |
|                 |                               | <i>P. aeruginosa</i>               | MIC = 70 $\mu\text{g}\cdot\text{mL}^{-1}$        |           |
|                 |                               | <i>S. typhimurium</i>              | MIC = 70 $\mu\text{g}\cdot\text{mL}^{-1}$        |           |
|                 |                               | <i>E. coli</i>                     | MIC = 150 $\mu\text{g}\cdot\text{mL}^{-1}$       |           |
|                 |                               | <i>E. cloacae</i>                  | MIC = 70 $\mu\text{g}\cdot\text{mL}^{-1}$        |           |
|                 |                               | <i>A. fumigatus</i>                | MIC = 1000 $\mu\text{g}\cdot\text{mL}^{-1}$      |           |
|                 |                               | <i>A. versicolor</i>               | MIC = 150 $\mu\text{g}\cdot\text{mL}^{-1}$       |           |
|                 |                               | <i>A. ochraceus</i>                | MIC = 100 $\mu\text{g}\cdot\text{mL}^{-1}$       |           |
|                 |                               | <i>A. niger</i>                    | MIC = 1500 $\mu\text{g}\cdot\text{mL}^{-1}$      |           |
| Poland          | Ethanol + water               | <i>T. viride</i>                   | MIC = 70 $\mu\text{g}\cdot\text{mL}^{-1}$        | [2]       |
|                 |                               | <i>P. funiculosum</i>              | MIC = 70 $\mu\text{g}\cdot\text{mL}^{-1}$        |           |
|                 |                               | <i>P. ochrochloron</i>             | MIC = 150 $\mu\text{g}\cdot\text{mL}^{-1}$       |           |
|                 |                               | <i>P. aurantiogriseum</i>          | MIC = 300 $\mu\text{g}\cdot\text{mL}^{-1}$       |           |
|                 |                               | <i>Staphylococcus epidermidis</i>  | MIC = 2500 $\mu\text{g}\cdot\text{mL}^{-1}$      |           |
|                 |                               | <i>S. aureus</i>                   | MIC = 1250–5000 $\mu\text{g}\cdot\text{mL}^{-1}$ |           |
|                 |                               | <i>Bacillus subtilis</i>           | MIC = 2500 $\mu\text{g}\cdot\text{mL}^{-1}$      |           |
| India           | Methanol or water (200 mg/mL) | <i>Micrococcus luteus</i>          | MIC = 630–1250 $\mu\text{g}\cdot\text{mL}^{-1}$  | [3]       |
|                 |                               | <i>E. coli</i>                     | MIC = 2500 $\mu\text{g}\cdot\text{mL}^{-1}$      |           |
|                 |                               | <i>Klebsiella pneumoniae</i>       | MIC = 1250–2500 $\mu\text{g}\cdot\text{mL}^{-1}$ |           |
|                 |                               | <i>P. aeruginosa</i>               | MIC = 1250–2500 $\mu\text{g}\cdot\text{mL}^{-1}$ |           |
|                 |                               | <i>Proteus mirabilis</i>           | MIC = 2500 $\mu\text{g}\cdot\text{mL}^{-1}$      |           |
|                 |                               | <i>E. coli</i>                     | IZ = 27–28 mm                                    |           |
|                 |                               | <i>P. aeruginosa</i>               | IZ = 20–25 mm                                    |           |
|                 |                               | <i>Salmonella typhi</i>            | IZ = 30–31 mm                                    |           |
|                 |                               | <i>S. aureus</i>                   | IZ = 29–31 mm                                    |           |
|                 |                               | <i>Streptococcus mutans</i>        | IZ = 25–27 mm                                    |           |
|                 |                               | <i>Penicillium</i> spp.            | IZ = 20–26 mm                                    |           |
|                 |                               | <i>A. fumigatus</i>                | IZ = 17–24 mm                                    |           |
|                 |                               | <i>A. niger</i>                    | IZ = 17–27 mm                                    |           |
|                 |                               | <i>Aspergillus flavus</i>          | IZ = 20–23 mm                                    |           |
|                 |                               | <i>Mucor indicus</i>               | IZ = 23–30 mm                                    |           |

|                |                                                                   |                                    |                                                |     |
|----------------|-------------------------------------------------------------------|------------------------------------|------------------------------------------------|-----|
|                | Chloroform,<br>ethanol,<br>methanol or<br>water                   | <i>A. niger</i>                    | MIC = 150–400 $\mu\text{g}\cdot\text{mL}^{-1}$ | [4] |
|                |                                                                   | <i>Aspergillus terreus</i>         | MIC = 200–450 $\mu\text{g}\cdot\text{mL}^{-1}$ |     |
|                |                                                                   | <i>Aspergillus sydowii</i>         | MIC = 200–350 $\mu\text{g}\cdot\text{mL}^{-1}$ |     |
|                |                                                                   | <i>Fusarium</i> spp.               | MIC = 150–400 $\mu\text{g}\cdot\text{mL}^{-1}$ |     |
|                |                                                                   | <i>Penicillium</i> spp.            | MIC = 150–400 $\mu\text{g}\cdot\text{mL}^{-1}$ |     |
|                | Acetone,<br>methanol,<br>chloroform<br>or water<br>(100<br>mg/mL) | <i>B. subtilis</i>                 | IZ = 10.5–21 mm                                | [5] |
|                |                                                                   | <i>Corynebacterium diphtheriae</i> | IZ = 12–23 mm                                  |     |
|                |                                                                   | <i>S. aureus</i>                   | IZ = 11.5–22 mm                                |     |
|                |                                                                   | <i>P. mirabilis</i>                | IZ = n.a.–14 mm                                |     |
|                |                                                                   | <i>E. coli</i>                     | IZ = 10–15.5 mm                                |     |
|                |                                                                   | <i>K. pneumoniae</i>               | IZ = n.a.–16.5 mm                              |     |
|                |                                                                   | <i>S. typhi</i>                    | IZ = n.a.–17.5 mm                              |     |
|                | Acetone                                                           | <i>P. aeruginosa</i>               | IZ = n.a.–12 mm                                | [6] |
|                |                                                                   | <i>B. subtilis</i>                 | MIC = 14,000 $\mu\text{g}\cdot\text{mL}^{-1}$  |     |
|                |                                                                   | <i>S. aureus</i>                   | MIC = 20,800 $\mu\text{g}\cdot\text{mL}^{-1}$  |     |
|                |                                                                   | <i>S. typhi</i>                    | MIC = 19,000 $\mu\text{g}\cdot\text{mL}^{-1}$  |     |
|                |                                                                   | <i>E. coli</i>                     | MIC = 8170 $\mu\text{g}\cdot\text{mL}^{-1}$    |     |
|                |                                                                   | <i>K. pneumoniae</i>               | MIC = 4330 $\mu\text{g}\cdot\text{mL}^{-1}$    |     |
| Pakistan       | Acetone,<br>methanol or<br>water (20%)                            | <i>P. aeruginosa</i>               | MIC = 21,300 $\mu\text{g}\cdot\text{mL}^{-1}$  | [7] |
|                |                                                                   | <i>Fusarium oxysporum</i> spp.     | IR = 40–57 %                                   |     |
| South<br>Corea | Water                                                             | <i>Alternaria alternata</i>        | IR = 33–52 %                                   | [8] |
|                |                                                                   | <i>Bacillus anthracis</i>          | MIC = 3500 $\mu\text{g}\cdot\text{mL}^{-1}$    |     |
|                |                                                                   | <i>B. cereus</i>                   | MIC = 2000 $\mu\text{g}\cdot\text{mL}^{-1}$    |     |
|                |                                                                   | <i>B. subtilis</i>                 | MIC = 3500 $\mu\text{g}\cdot\text{mL}^{-1}$    |     |
|                |                                                                   | <i>M. luteus</i>                   | MIC = 750 $\mu\text{g}\cdot\text{mL}^{-1}$     |     |
|                |                                                                   | <i>S. aureus</i>                   | MIC = 1500 $\mu\text{g}\cdot\text{mL}^{-1}$    |     |
|                |                                                                   | <i>E. coli</i>                     | MIC = 1750 $\mu\text{g}\cdot\text{mL}^{-1}$    |     |
|                |                                                                   | <i>Klebsiella oxytoca</i>          | MIC = 5000 $\mu\text{g}\cdot\text{mL}^{-1}$    |     |
|                |                                                                   | <i>K. pneumoniae</i>               | MIC = 5000 $\mu\text{g}\cdot\text{mL}^{-1}$    |     |
|                |                                                                   | <i>Proteus vulgaris</i>            | MIC = 1250 $\mu\text{g}\cdot\text{mL}^{-1}$    |     |
|                |                                                                   | <i>Salmonella thompson</i>         | MIC = 5000 $\mu\text{g}\cdot\text{mL}^{-1}$    |     |
|                |                                                                   | <i>S. typhi</i>                    | MIC = 2500 $\mu\text{g}\cdot\text{mL}^{-1}$    |     |
|                |                                                                   | <i>S. typhimurium</i>              | MIC = 5000 $\mu\text{g}\cdot\text{mL}^{-1}$    |     |
| Iran           | Chloroform<br>or hexane                                           | <i>Serratia marcescens</i>         | MIC = 5000 $\mu\text{g}\cdot\text{mL}^{-1}$    | [9] |
|                |                                                                   | <i>S. aureus</i>                   | MIC = 6250 $\mu\text{g}\cdot\text{mL}^{-1}$    |     |
|                |                                                                   | <i>B. subtilis</i>                 | MIC = 6250 $\mu\text{g}\cdot\text{mL}^{-1}$    |     |
|                |                                                                   | <i>E. coli</i>                     | MIC > 10,000 $\mu\text{g}\cdot\text{mL}^{-1}$  |     |
|                |                                                                   | <i>P. aeruginosa</i>               | MIC > 10,000 $\mu\text{g}\cdot\text{mL}^{-1}$  |     |
|                |                                                                   | <i>Candida albicans</i>            | MIC = 6250 $\mu\text{g}\cdot\text{mL}^{-1}$    |     |

IR: inhibition rate; IZ: inhibition zone; MIC: minimum inhibitory concentration; n.a.: no activity.

## References (reference numbers do not match those in the main text)

1. Stojković, D.S.; Barros, L.; Calhelha, R.C.; Glamočlija, J.; Ćirić, A.; Van Griensven, L.J.; Soković, M.; Ferreira, I.C. A detailed comparative study between chemical and bioactive properties of *Ganoderma lucidum* from different origins. *International Journal of Food Sciences and Nutrition* **2014**, *65*, 42-47.
2. Skalicka-Wozniak, K.; Szypowski, J.; Los, R.; Siwulski, M.; Sobieralski, K.; Glowniak, K.; Malm, A. Evaluation of polysaccharides content in fruit bodies and their antimicrobial activity of four *Ganoderma lucidum* (W Curt.: Fr.) P. Karst. strains cultivated on different wood type substrates. *Acta Societatis Botanicorum Poloniae* **2012**, *81*.
3. Sridhar, S.; Sivaprakasam, E.; Balakumar, R.; Kavitha, D. Evaluation of antibacterial and antifungal activity of *Ganoderma lucidum* (Curtis) P. Karst fruit bodies extracts. *World Journal of Science and Technology* **2011**, *1*, 8-11.
4. Radhika, R.; Rajan, S. Antifungal potentials of *Ganoderma lucidum* extracts. *Plant Cell Biotechnology and Molecular Biology* **2021**, *22*, 22-27.
5. Kamble, R.; Venkata, S.; Gupte, A. Antimicrobial activity of *Ganoderma lucidum* mycelia. *J Pure Appl Microbiol* **2011**, *5*, 983-986.
6. Quereshi, S.; Pandey, A.; Sandhu, S. Evaluation of antibacterial activity of different *Ganoderma lucidum* extracts. *J Sci Res* **2010**, *3*, 9-13.
7. Shahid, A.A.; Asif, M.; Shahbaz, M.; Ali, M. Antifungal potential of *Ganoderma lucidum* extract against plant pathogenic fungi of *Calendula officinalis* L. In Proceedings of 5th International Conference on Biological, Chemical and Environmental Sciences (BCES-2016) March; pp. 24-25.
8. Yoon, S.Y.; Eo, S.K.; Kim, Y.S.; Lee, C.K.; Han, S.S. Antimicrobial activity of *Ganoderma lucidum* extract alone and in combination with some antibiotics. *Arch. Pharm. Res.* **1994**, *17*, 438-442, doi:10.1007/BF02979122.
9. Vazirian, M.; Faramarzi, M.A.; Ebrahimi, S.E.S.; Esfahani, H.R.M.; Samadi, N.; Hosseini, S.A.; Asghari, A.; Manayi, A.; Mousazadeh, S.A.; Asef, M.R. Antimicrobial effect of the Lingzhi or Reishi medicinal mushroom, *Ganoderma lucidum* (higher Basidiomycetes) and its main compounds. *International Journal of Medicinal Mushrooms* **2014**, *16*.
